# Supplementary material for: Regulation of bile duct epithelial injury by hepatic CD71+ erythroid cells
Source: JCI journal article supplement (doi:10.1172/jci.insight.135751), 2020-05-14
Supplement: sd1 [file 1]

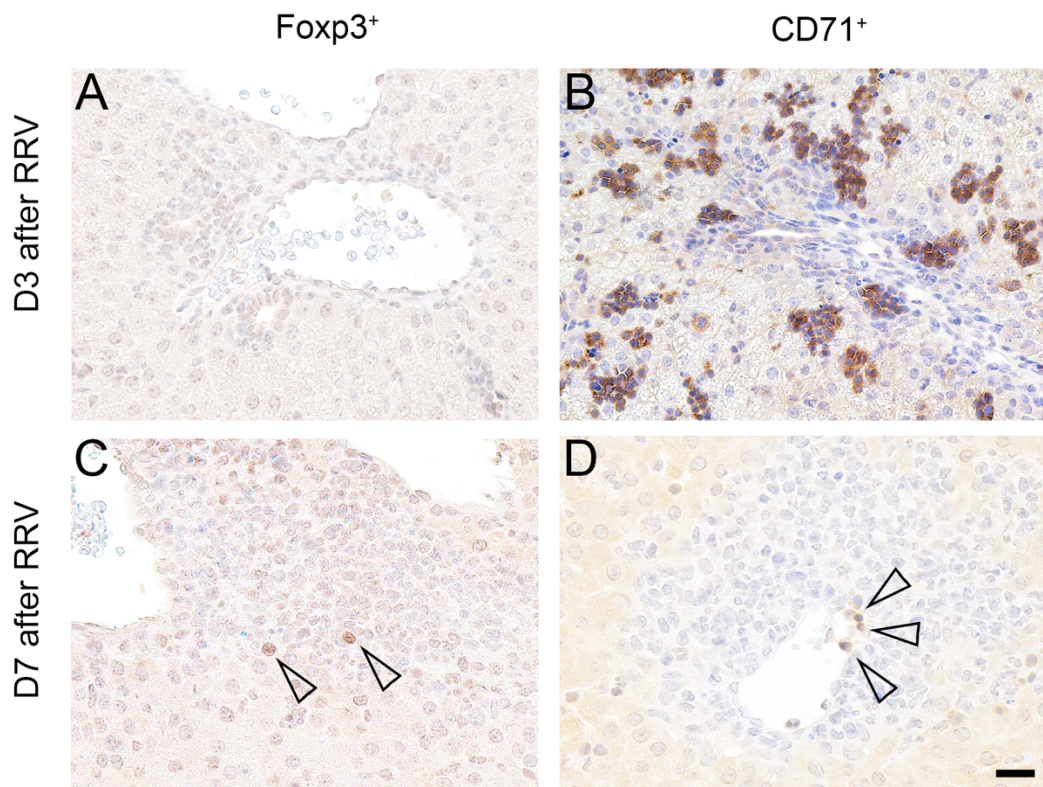

**Supplementary Figure 1. Localization of Foxp3<sup>+</sup>Tregs and CD71<sup>+</sup>erythroid cells in liver tissues.** Liver tissues were obtained from mice 3 days or 7 days after RRV infection. Immunohistochemical staining using anti-Foxp3 or anti-CD71 antibody show absence of Foxp3<sup>+</sup>cells but prevalence of CD71<sup>+</sup> cells at day 3 (**A** & **B**). At day 7, the biliary epithelium in the portal tract was destroyed and replaced by infiltrating immune cells. Foxp3<sup>+</sup> cells were present in the vicinity of inflamed portal tract, while CD71<sup>+</sup> cells were moving to the vein in the portal tract (**C** & **D**). Scale bar: 20  $\mu$ M. N=3-4 mice/group.

## Supplementary table 1

Genes significantly upregulated in survived and non-survived group.

| Survived group (N=87) | Non-survived group (N=84) |
|-----------------------|---------------------------|
| <i>SPTA1</i>          | <i>CEBPA</i>              |
| <i>GYPB</i>           | <i>SNRPN</i>              |
| <i>HSPA1B</i>         | <i>KRT17</i>              |
| <i>TRIM69</i>         | <i>PDZK1IP1</i>           |
| <i>ADH1C</i>          |                           |
| <i>TXNRD1</i>         |                           |
| <i>CA1</i>            |                           |
| <i>GYPB</i>           |                           |
| <i>HBA1</i>           |                           |
| <i>AHSP</i>           |                           |
| <i>PLGLB1</i>         |                           |
| <i>SEPP1</i>          |                           |
| <i>HBA2</i>           |                           |
| <i>IL6ST</i>          |                           |
| <i>HBG2</i>           |                           |
| <i>GPX3</i>           |                           |
| <i>SMN2</i>           |                           |
| <i>HFM1</i>           |                           |
| <i>HBG1</i>           |                           |
| <i>HBD</i>            |                           |
| <i>C4A</i>            |                           |
| <i>SMN2</i>           |                           |
| <i>HFM1</i>           |                           |
| <i>HBG1</i>           |                           |
| <i>HBD</i>            |                           |
| <i>C4A</i>            |                           |
